# Supplementary material for: Theoretical investigation of triplet potential energy surfaces for (C^C*) cyclometalated platinum(ii) complexes and the corresponding control strategies
Source: Royal Society of Chemistry journal article supplement (doi:10.1039/d2nj03062d), 2022-01-01
Supplement: d2nj03062d1.pdf [file d2nj03062d1.pdf]

## **Supporting Information**

### **Theoretical Investigation of Triplet Energy Potential Surfaces for (C<sup>^</sup>C<sup>\*</sup>) Cyclometalated Platinum(II) Complexes and Corresponding Control Strategies**

Yafei Luo <sup>a</sup>, Jiayu Xu <sup>a</sup>, Zhongzhu Chen <sup>a</sup>, Zhigang Xu <sup>a</sup>, Dianyong Tang <sup>a, \*</sup>

<sup>a</sup>. National & Local Joint Engineering Research Center of Targeted and Innovative Therapeutics, Chongqing Engineering Laboratory of Targeted and Innovative Therapeutics, Chongqing Key Laboratory of Kinase Modulators as Innovative Medicine, Chongqing Collaborative Innovation Center of Targeted and Innovative Therapeutics, College of Pharmacy (International Academy of Targeted Therapeutics and Innovation), Chongqing University of Arts and Sciences, Chongqing 402160, P. R. China

\* Address correspondence to this author at Chongqing University of Arts and Sciences, Chongqing 402160, P. R. China, E-mail: tangdy2008@163.com

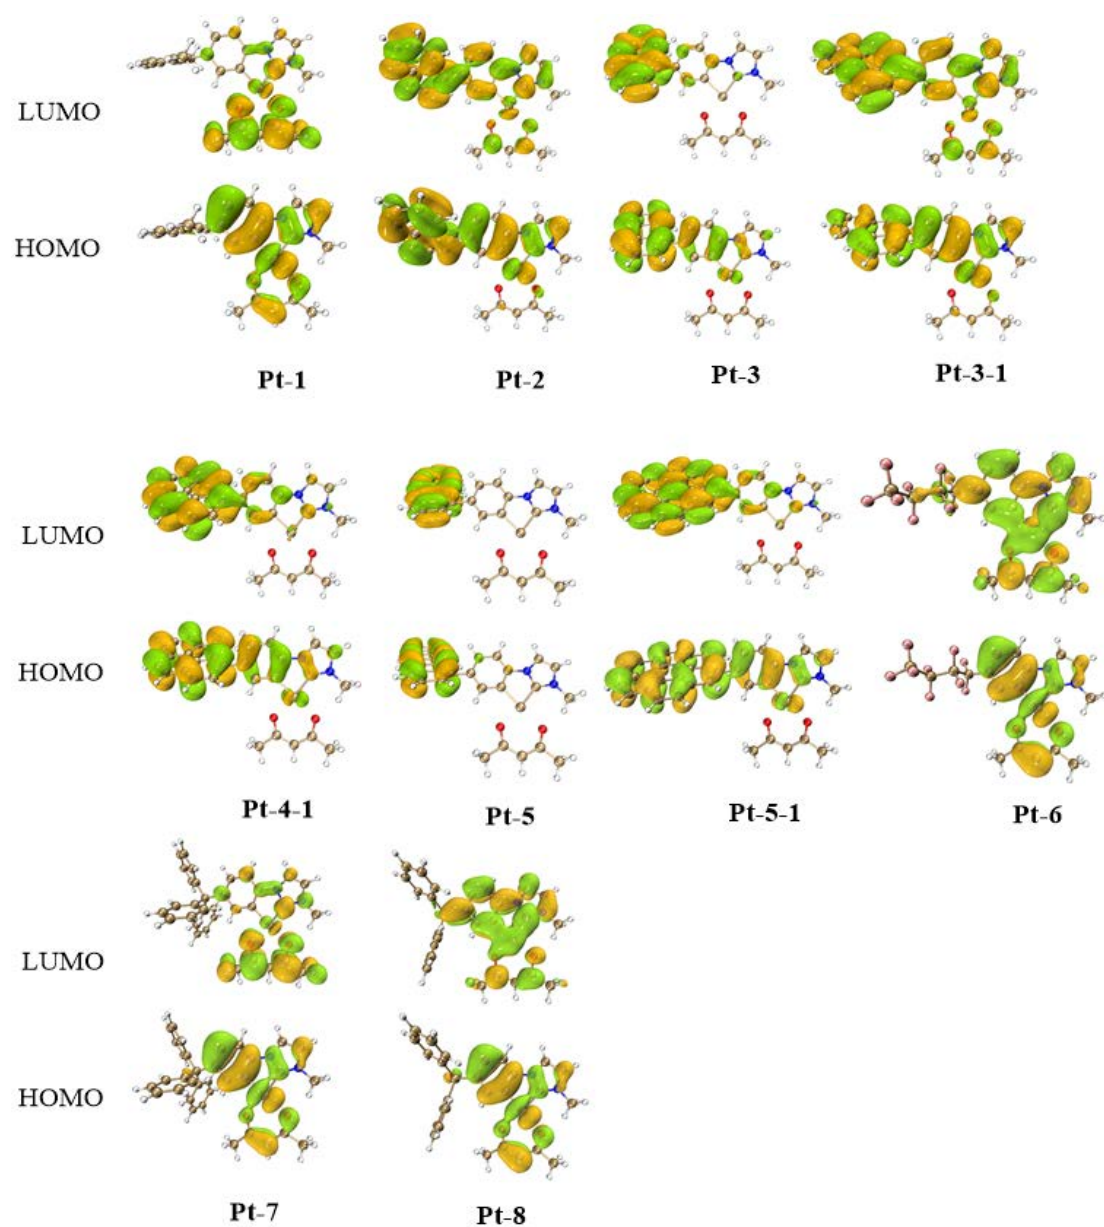

**Figure S1.** HOMO and LUMO of monometallic Pt(II) complexes at the  $S_0$  equilibrium geometry.

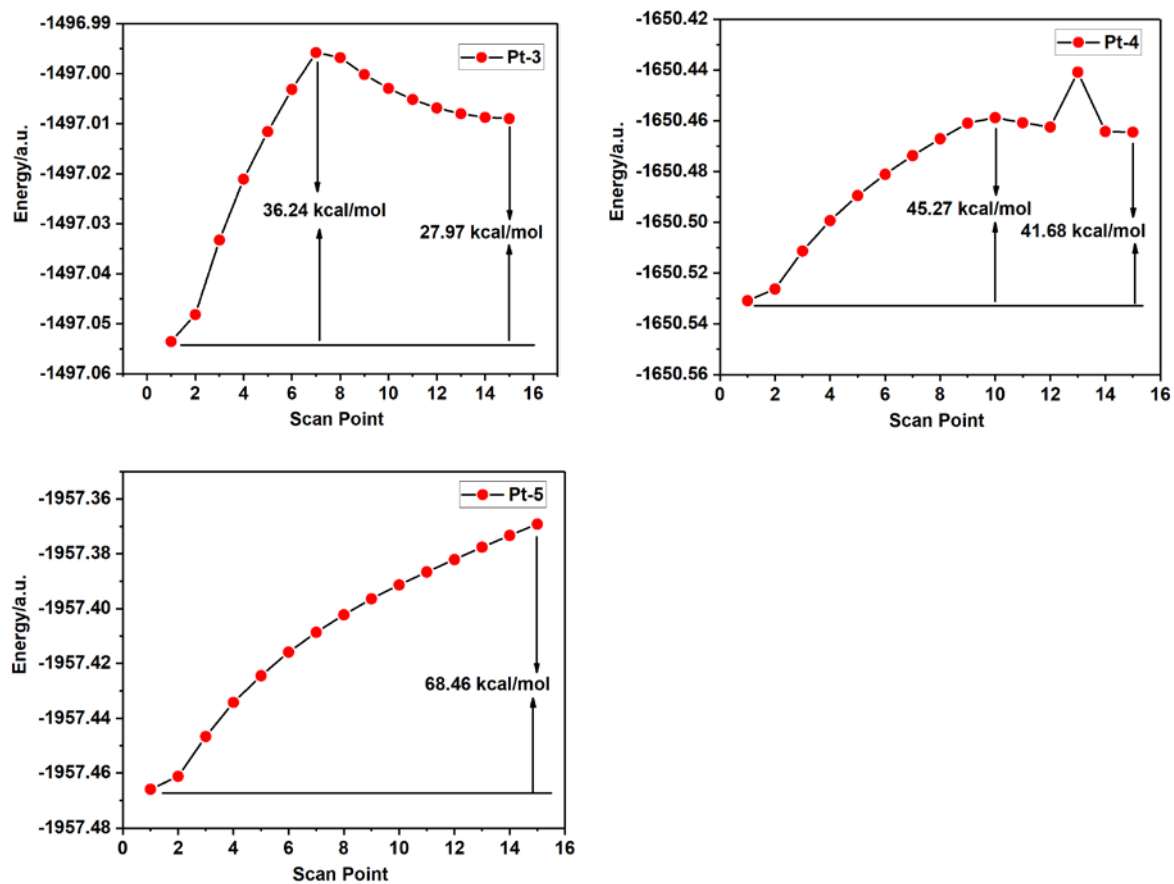

**Figure S2.** Potential energy surface scans for **Pt-3**, **Pt-4** and **Pt-5** between  $T_1$  and  $^3\text{MC}$  states, respectively.

## The details about calculations of radiative rate constants

Based on the optimized geometries of the lowest triplet states, the phosphorescence radiative decay rates were computed using the quadratic response (QR) time-dependent (TD)-B3LYP approach. The rate constants ( $k_r$ ) for phosphorescence radiative decay from the three spin sublevels (indexed by  $i$ ) of the  $T_1$  states, can be expressed as follow:

$$\kappa_i^r = \frac{1}{\tau_i} = \kappa^r(S_0, T_{em}^i) = \frac{4\alpha_0^3}{3t_0} \Delta E_{S_0-T_{em}^i}^3 \sum_{j \in \{x, y, z\}} |M_j^i|^2 \quad (1)$$

Where  $\tau_i$  refers to radiative lifetime from sublevel  $i$  ( $i=1, 2, 3$ ) of triplet excited states to the ground state,  $\alpha_0$  is the fine-structure constant,  $t_0 = (4\pi\epsilon_0)^2 \hbar^3 / m_e e^4$ ,  $\Delta E_{S_0-T_{em}^i}$  is the transition energy between the  $T_1$  and  $S_0$  state,  $M_j^i$  is on behalf of the spin-orbit coupled  $T_1 \rightarrow S_0$  transition dipole moment, which can be shown as follow and calculated using the QR TD-B3LYP approach.

$$M_j^i = \sum_{n=0}^{\infty} \frac{\langle S_0 | \hat{\mu}_j | S_n \rangle \langle S_n | \hat{H}_{SO} | T_{em}^i \rangle}{E(S_n) - E(T_{em}^i)} + \sum_{m=1}^{\infty} \frac{\langle S_0 | \hat{H}_{SO} | T_m \rangle \langle T_m | \hat{\mu}_j | T_{em}^i \rangle}{E(T_m) - E(S_0)} \quad j \in \{x, y, z\} \quad (2)$$

The Cartesian components  $j \in \{x, y, z\}$  are used to represent spin eigenfunctions.

The operators  $\hat{\mu}_j$ ,  $\hat{H}_{SO}$  represent the electric dipole and spin-orbit Hamiltonian, respectively.
